# Supplementary material
Source: PubMed Central journal article supplement (PMC2785572)

## SUPPLEMENTAL FIGURE LEGEND

**FIGURE S1. MEKK1 and POSH are not E3 ligases for MKK4.** *A & B*, Immunoprecipitation (IP)/Western blotting (WB) of 293T cells transfected with MEKK1 to detect ubiquitinated (upper panels), phosphorylated (p), or total proteins (lower panels). ERK2 used as a positive control for MEKK1 E3 ligase substrate. *C & D*, IP/WB of 293T cells transfected with POSH and then treated with sorbitol (*C*) or co-transfected with POSH and MEKK1 (*D*) to detect ubiquitinated (upper panels), phosphorylated (p), or total proteins (lower panels). WT, wild-type; CA, inactive E3 ligase mutant (Cys433/478Ala); DA, kinase-dead mutant (Asp1369Ala). Actin used as a loading control.

**Fig. S1**

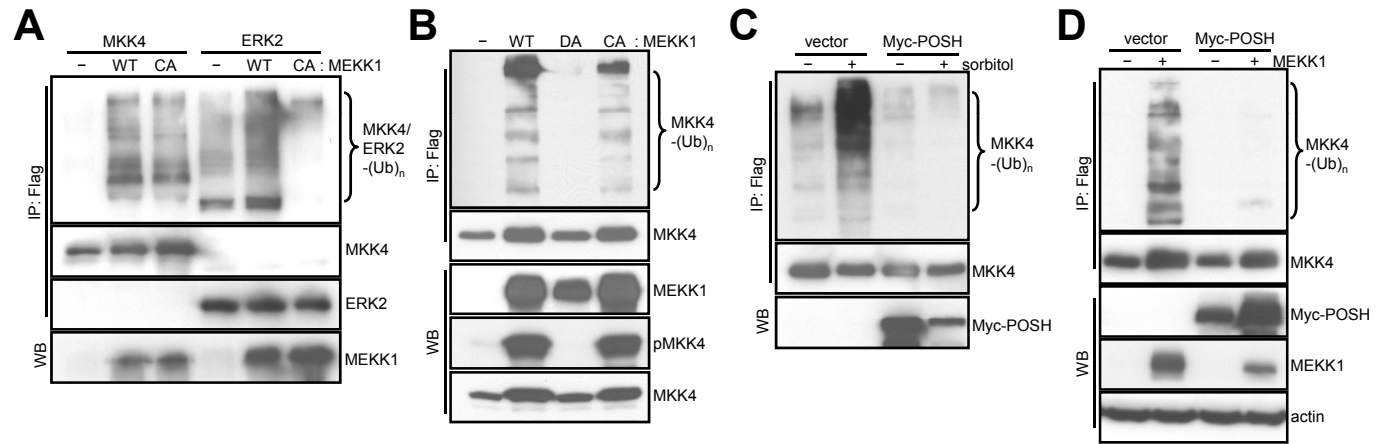

Supplement: supp_M109.044958_jbc.M109.044958-1.pdf [file supp_M109.044958_jbc.M109.044958-1.pdf]
